# Supplementary material
Source: publisher figshare collection journal article supplement (https://acs.figshare.com/ndownloader/files/20205759)
Supplement: Supplementary file 1 [file 20205759]

## **Supporting Information**

### **Counterion-Tunable Thermosensitivity of Strong Polyelectrolyte Brushes**

Hongtao Cai, Ran Kou, and Guangming Liu\*

*Hefei National Laboratory for Physical Sciences at the Microscale, Key Laboratory of Surface and Interface Chemistry and Energy Catalysis of Anhui Higher Education Institutes, Department of Chemical Physics, University of Science and Technology of China, No.96, JinZhai Road, Hefei, P. R. China 230026*

Number of pages: 4

Number of figures: 2

Number of tables: 1

**Table S1.** Summary of the refractive indices (n) of SPBs obtained from the ellipsometry measurements at a wavelength of 589.3 nm in water at 17 °C.

| Type of SPBs | PSSNa | PSSP <sub>4442</sub> | PSSP <sub>4444</sub> | PSSP <sub>4446</sub> | PSSP <sub>4448</sub> |
|--------------|-------|----------------------|----------------------|----------------------|----------------------|
| n            | 1.416 | 1.436                | 1.447                | 1.471                | 1.481                |

Table S1 shows that the refractive indices of SPBs are dependent on the type of the counterions. For the PSSP<sub>444m</sub> brushes, the refractive index of SPBs increases with increasing value of m.

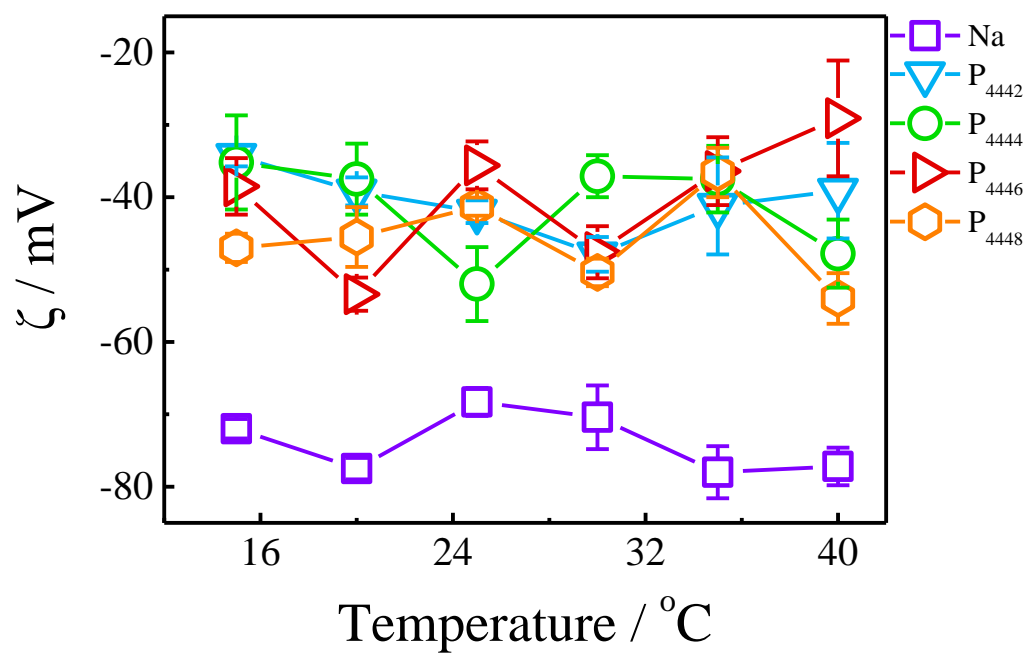

**Figure S1.** Zeta potentials ( $\zeta$ ) of both the PSSNa and the PSSP<sub>444m</sub> brushes as a function of temperature.

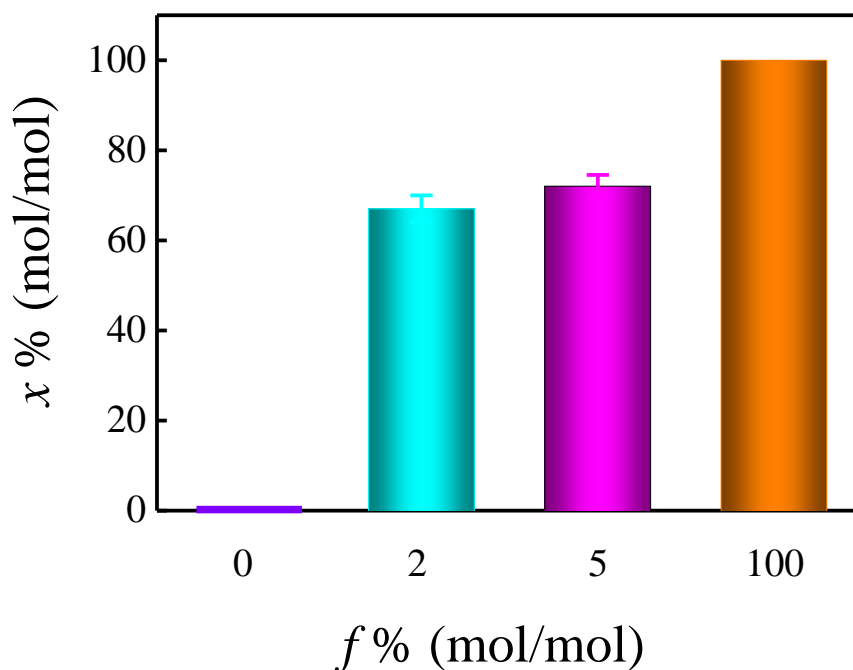

**Figure S2.** The molar fraction of the  $P_{4448}^+$  counterion ( $x$ ) in the brushes as a function of the molar fraction of the  $P_{4448}^+$  ion ( $f$ ) in the mixed salt solutions.

In this work, the molar fraction of  $P_{4448}^+$  counterion in the brushes is in agreement with the atomic ratio of phosphonium to sulfur (P/S) of the PSSNa/ $P_{4448}$  brushes. Therefore, the molar fraction of  $P_{4448}^+$  counterion in the brushes can be obtained from the XPS measurements by normalizing the values of P/S of the PSSNa/ $P_{4448}$  brushes to the value of P/S of the PSSP $_{4448}$  brushes. In Figure S2, the molar fraction of the  $P_{4448}^+$  counterion in the brushes is larger than that of the  $P_{4448}^+$  ion in the mixed salt solutions, indicating that the  $P_{4448}^+$  counterion has a higher affinity to the negatively charged sulfonate group than the  $Na^+$  counterion.
